# Supplementary material for: Hydrophobic cross-linked nanoparticles comprising polystyrene and poly(thiophene-diketopyrrolopyrrole) segments for non-volatile memory applications
Source: Royal Society of Chemistry journal article supplement (doi:10.1039/d3tc01073b), 2023-01-01
Supplement: d3tc01073b1.pdf [file d3tc01073b1.pdf]

Supporting Information

**Hydrophobic Cross-linked Nanoparticles Comprised of Polystyrene and Poly(thiophene-diketopyrrolopyrrole) Segments for Nonvolatile Memory Applications**

*Yueh-Chun Huang<sup>a</sup>, Tomoya Yahagi<sup>c</sup>, Zi-En Chiang<sup>a</sup>, Qun-Gao Chen<sup>a</sup>, Wen-Ya Lee<sup>a,b,\*</sup>, Tomoya Higashihara<sup>c\*</sup>*

*<sup>a</sup> Department of Chemical Engineering and Biotechnology, National Taipei University of Technology, Taipei 10608 Taiwan*

*Email: [wenyalee@mail.ntut.edu.tw](mailto:wenyalee@mail.ntut.edu.tw)*

*<sup>b</sup> Research Center for Mind, Brain, and Learning, National Chengchi University, Taipei 11605 Taiwan.*

*<sup>c</sup> Department of Organic Materials Science, Graduate School of Organic Materials Science, Yamagata University, Yonezawa, Yamagata 992-8510, Japan*

*Email: [thigashihara@yz.yamagata-u.ac.jp](mailto:thigashihara@yz.yamagata-u.ac.jp)*

Table S1. Optical band gaps and HOMO/LUMO levels of PDPP-PS copolymers.

| sample    | Band gap (eV) | HOMO (eV) | LUMO (eV) |
|-----------|---------------|-----------|-----------|
| PDPP-PS-1 | 1.21          | -5.53     | -4.31     |
| PDPP-PS-2 | 1.21          | -5.58     | -4.37     |
| PDPP-PS-3 | 1.22          | -5.55     | -4.33     |
| PDPP-PS-4 | 1.25          | -5.54     | -4.30     |
| PDPP-PS-5 | 1.24          | -5.53     | -4.30     |
| PDPP-PS-6 | 1.29          | -5.55     | -4.25     |

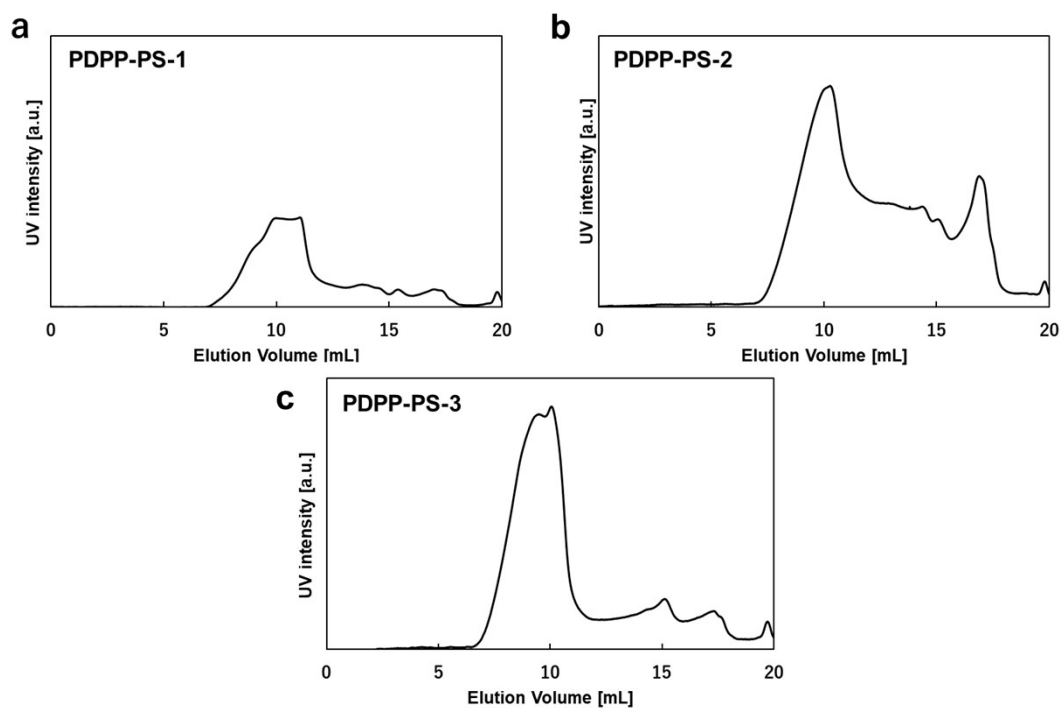

Figure S1. SEC UV traces of (a) PDPP-PS-1, (b) PDPP-PS-2, and (c) PDPP-PS-3.

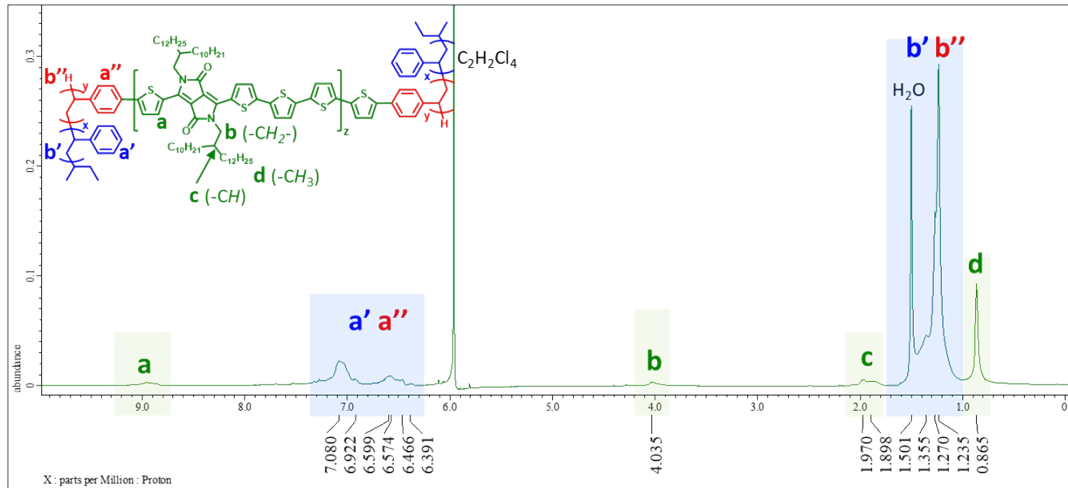

Figure S2.  $^1\text{H}$  NMR spectrum of PDPP-PS-1.

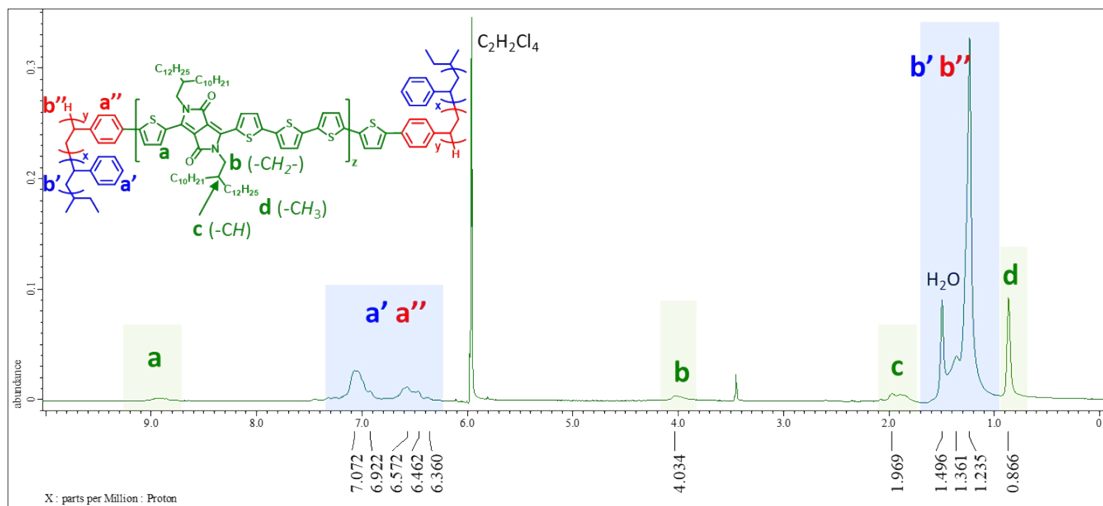

Figure S3.  $^1\text{H}$  NMR spectrum of PDPP-PS-2.

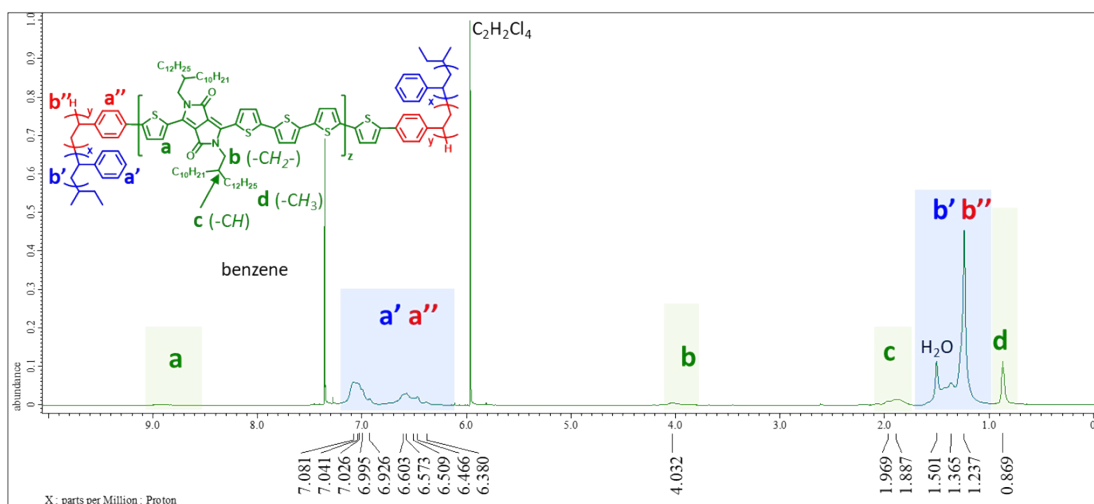

**Figure S4.**  $^1\text{H}$  NMR spectrum of PDPP-PS-3.

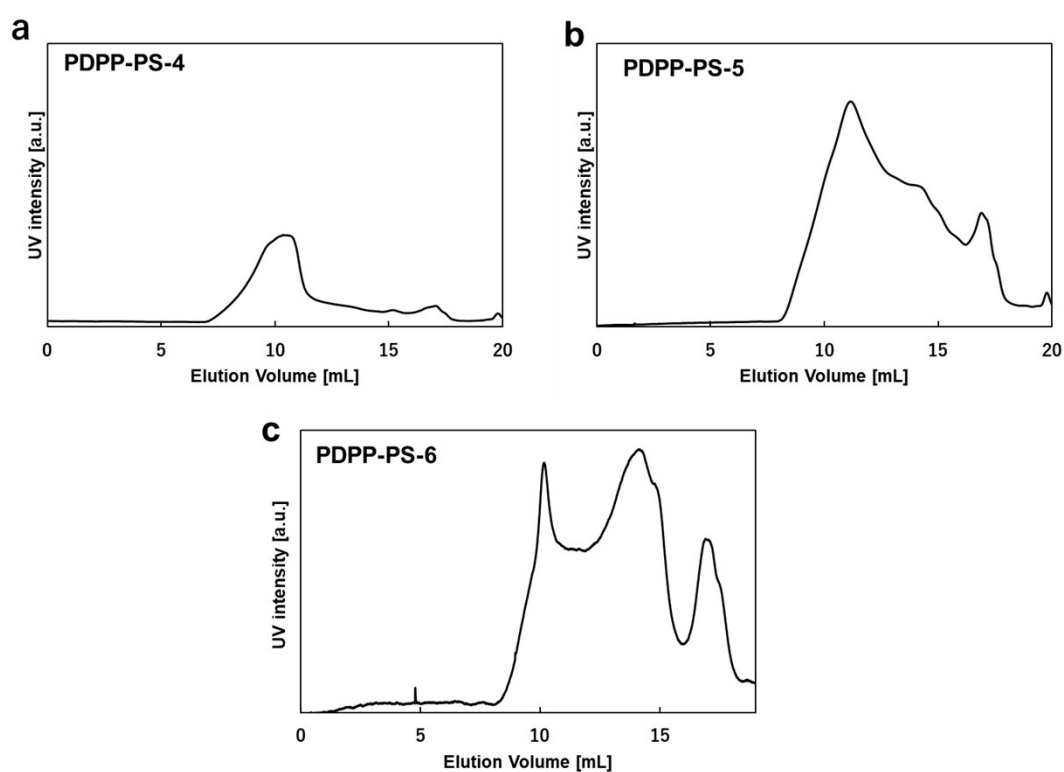

**Figure S5.** SEC UV traces of (a) PDPP-PS-4, (b) PDPP-PS-5, and (c) PDPP-PS-6.

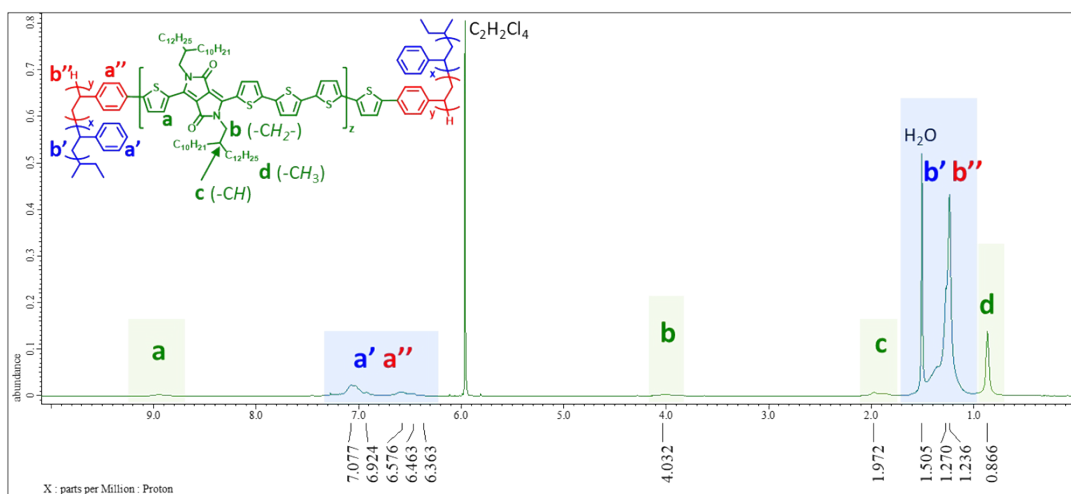

Figure S6.  $^1\text{H}$  NMR spectrum of PDPP-PS-4.

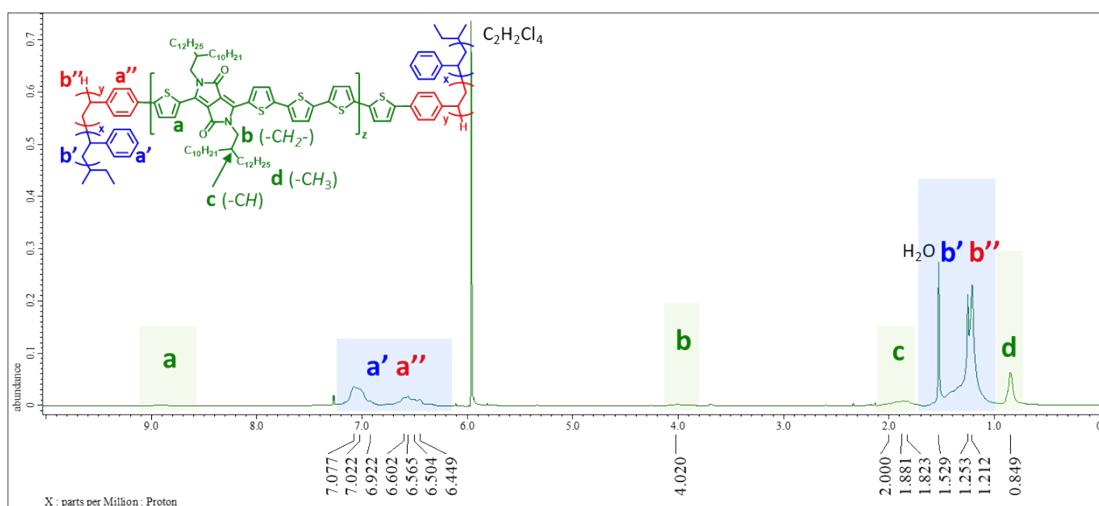

Figure S7.  $^1\text{H}$  NMR spectrum of PDPP-PS-5.

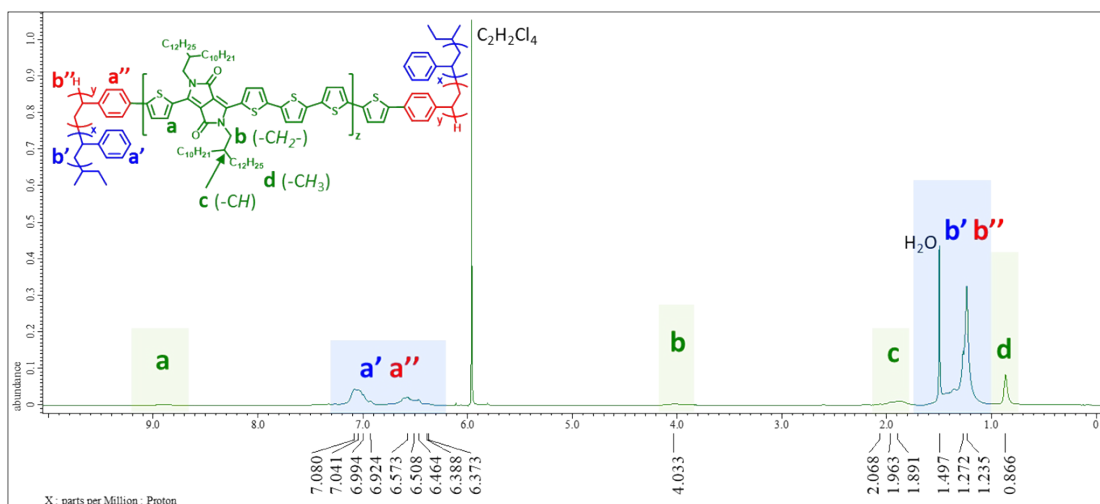

**Figure S8.**  $^1\text{H}$  NMR spectrum of PDPP-PS-6.

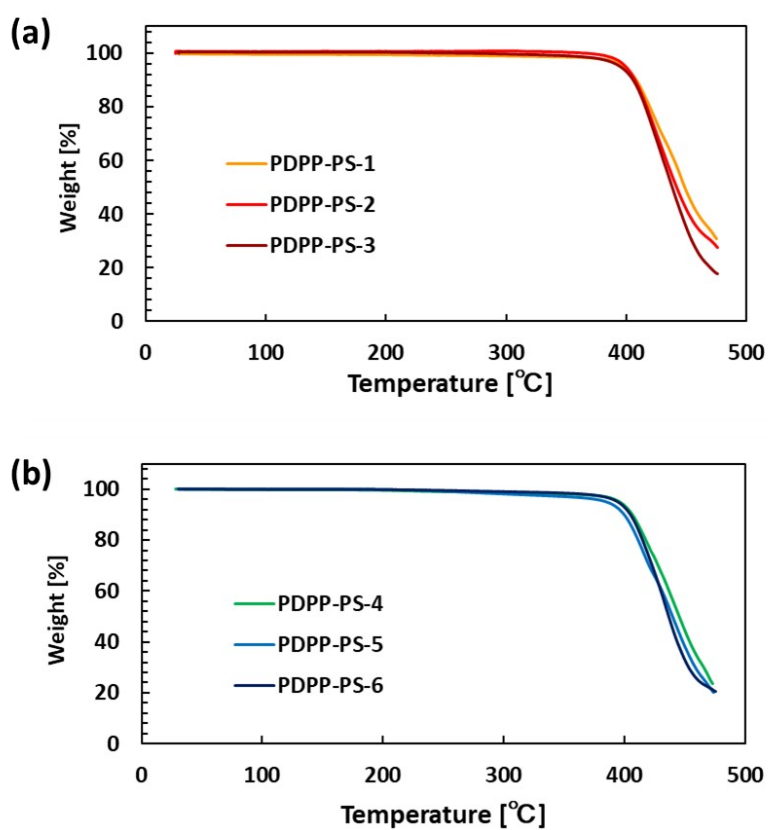

**Figure S9.** TGA thermograms of (a) PDPP-PS-1, PDPP-PS-2, and PDPP-PS-3, and (b) PDPP-PS-4, PDPP-PS-5, and PDPP-PS-6.

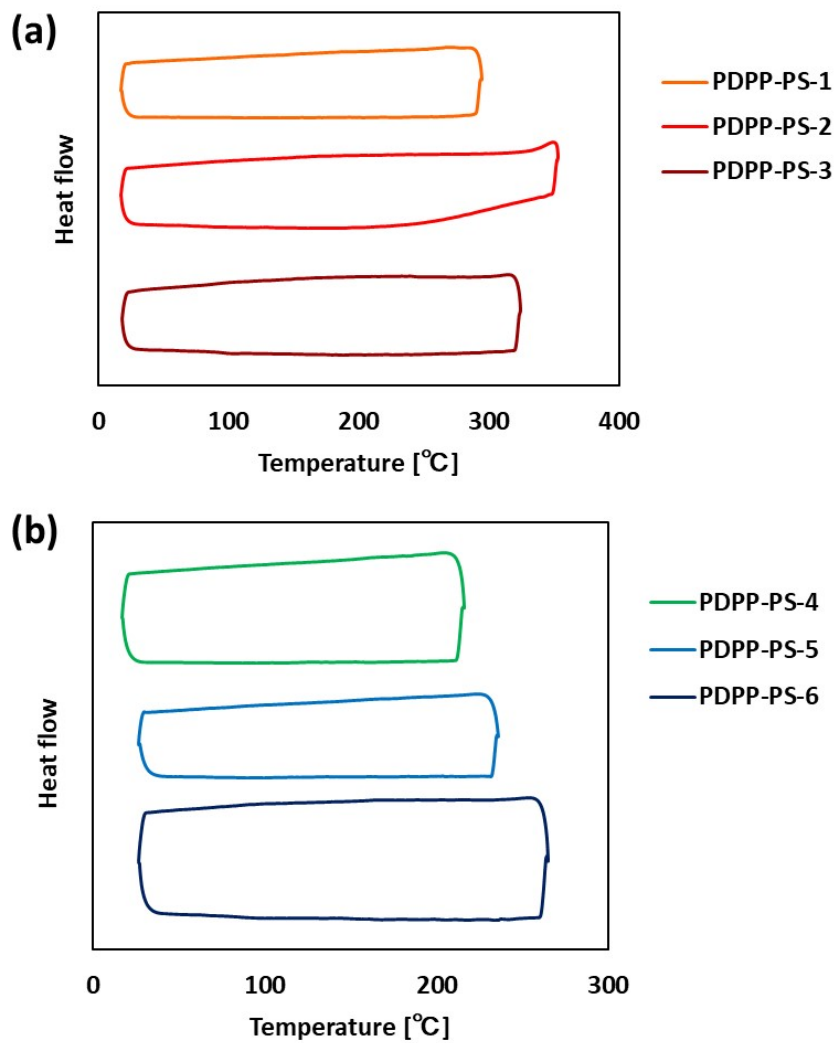

**Figure S10.** DSC thermograms (1<sup>st</sup> cooling/2<sup>nd</sup> heating scans) of (a) **PDPP-PS-1**, **PDPP-PS-2**, and **PDPP-PS-3**, and (b) **PDPP-PS-4**, **PDPP-PS-5**, and **PDPP-PS-6** measured at a heating/cooling rate of 10 °C/min.

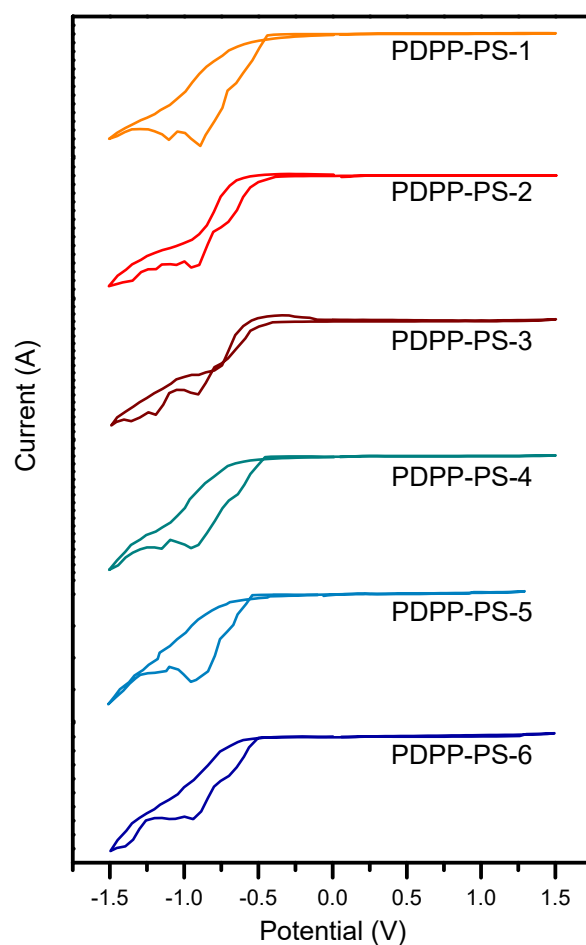

**Figure S11.** Cyclic voltammetry curves of the PDPP-PS copolymers.

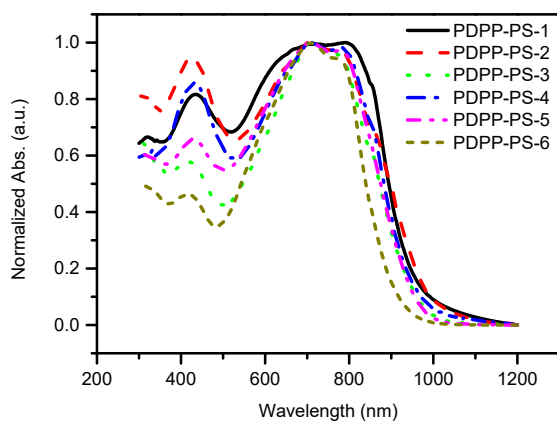

**Figure S12.** UV-vis spectra of the polymer thin films based on the PDPP-PS copolymers.



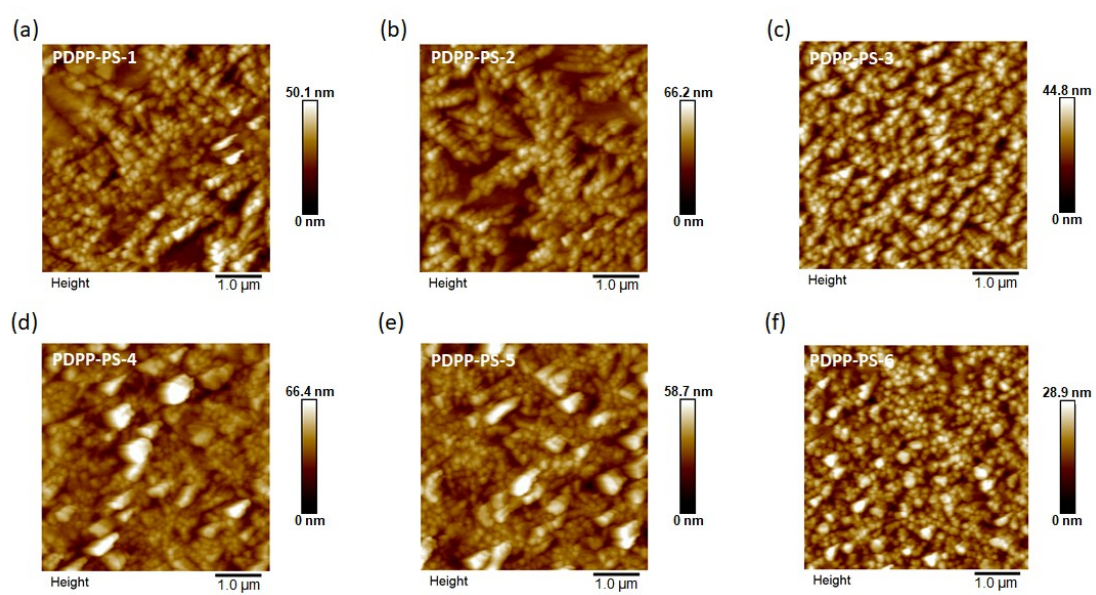

**Figure S13.** AFM topographic images of pentacene on different polymer surfaces: (a) PDPP-PS-1, (b) PDPP-PS-2, (c) PDPP-PS-3, (d) PDPP-PS-4, (e) PDPP-PS-5, and (f) PDPP-PS-6) on the size of 5 μm × 5 μm.

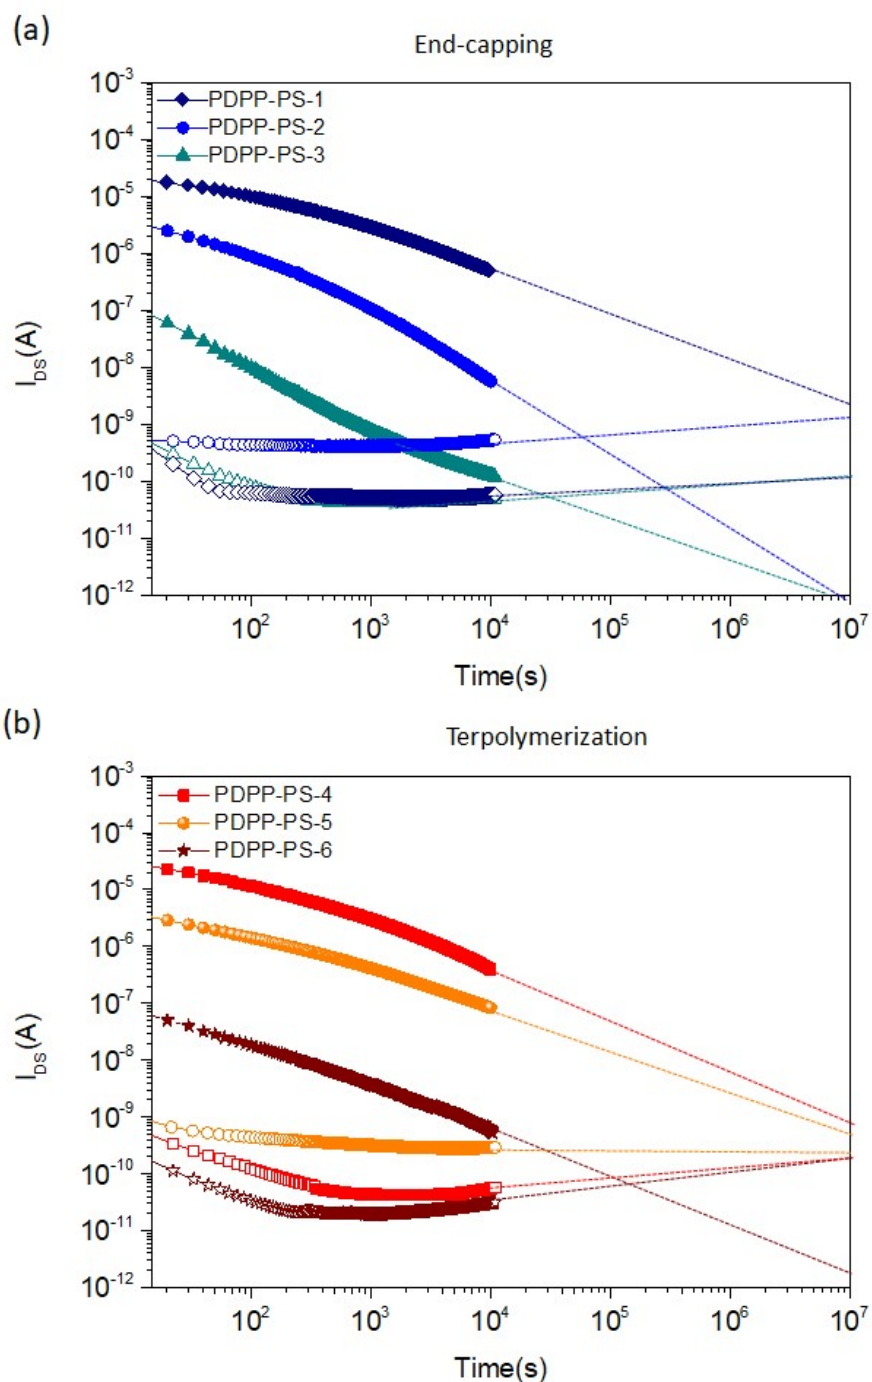

**Figure S14.** The currents at ON and OFF states of the (a) end-capping and (b) terpolymerization PDPP-PS devices were measured at  $V_g = 0$  V, respectively. The charge retention time is estimated by the extrapolation of each ON and OFF curves.

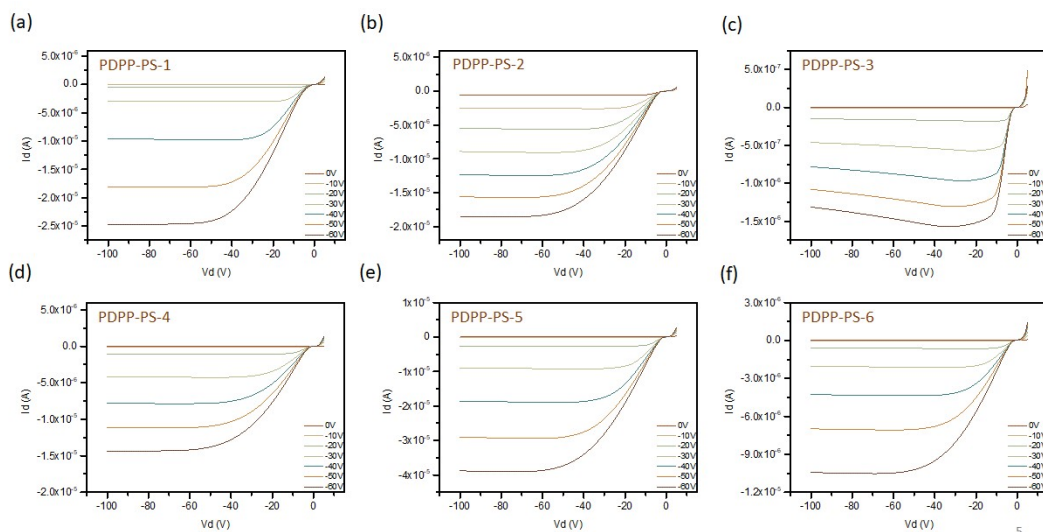

**Figure S15.** Output curves of pentacene OFETs based on PDPP-PS/SiO<sub>2</sub> dielectrics: (a) PDPP-PS-1, (b) PDPP-PS-2, (c) PDPP-PS-3, (d) PDPP-PS-4, (e) PDPP-PS-5, and (f) PDPP-PS-6), respectively.

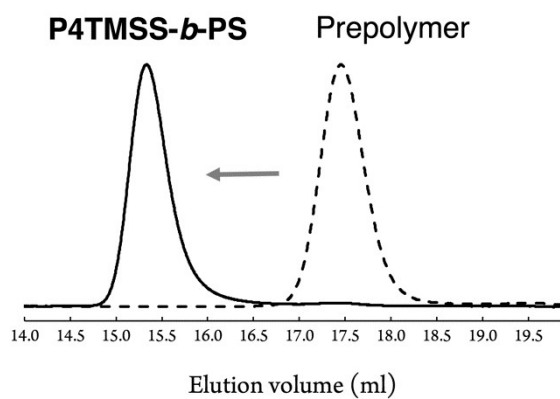

**Figure S16.** SEC UV traces of (a) P4TMSS (1<sup>st</sup> block) and (b) PS-*b*-P4TMSS (eluent: THF, 40 °C),<sup>[30]</sup> Copyright: 2019, Wiley-VCH.

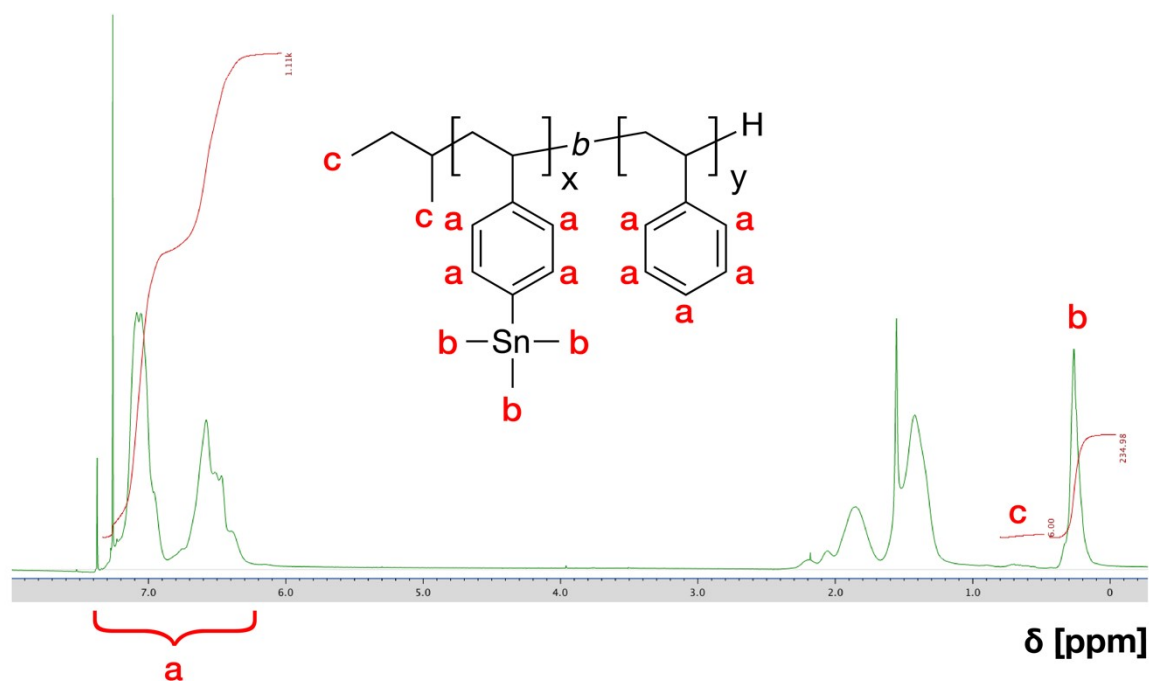

**Figure S17.**  $^1\text{H}$  NMR spectrum of PS-*b*-P4TMSS,<sup>[30]</sup> Copyright: 2019, Wiley-VCH.

## References

1. W.-C. Yang, Y.-C. Lin, S. Inagaki, H. Shimizu, E. Ercan, L.-C. Hsu, C.-C. Chueh, T. Higashihara and W.-C. Chen, *Adv. Sci.*, 2022, **9**, 2105190.
2. T.-F. Yu, H.-Y. Chen, M.-Y. Liao, H.-C. Tien, T.-T. Chang, C.-C. Chueh and W.-Y. Lee, *ACS Appl. Mater. Interfaces*, 2020, **12**, 33968-33978.
3. Y.-T. Yang, Y.-S. Wu, W. He, H.-C. Tien, W.-C. Yang, T. Michinobu, W.-C. Chen, W.-Y. Lee and C.-C. Chueh, *Adv. Sci.*, 2022, **9**, 2203025.
4. Y.-T. Yang, H.-C. Tien, C.-C. Chueh and W.-Y. Lee, *Mater. Chem. Phys.*, 2022, **287**, 126263.
5. H. Lee, Y. Won and J. H. Oh, *J. Polym. Sci.*, 2022, **60**, 348-376.
6. L. Shao, Y. Zhao and Y. Liu, *Adv. Funct. Mater.*, 2021, **31**, 2101951.
7. B. Yang, Y. Lu, D. Jiang, Z. Li, Y. Zeng, S. Zhang, Y. Ye, Z. Liu, Q. Ou, Y. Wang, S. Dai, Y. Yi and J. Huang, *Adv. Mater.*, 2020, **32**, 2001227.
8. Y. Lee, J. Y. Oh, W. Xu, O. Kim, T. R. Kim, J. Kang, Y. Kim, D. Son, J. B.-H. Tok, M. J. Park, Z. Bao and T.-W. Lee, *Sci. Adv.*, 2018, **4**, eaat7387.
9. Y. Kim, A. Chortos, W. Xu, Y. Liu, J. Y. Oh, D. Son, J. Kang, A. M. Foudeh, C. Zhu, Y. Lee, S. Niu, J. Liu, R. Pfattner, Z. Bao and T.-W. Lee, *Science*, 2018, **360**, 998-1003.

10. Q.-D. Ling, D.-J. Liaw, C. Zhu, D. S.-H. Chan, E.-T. Kang and K.-G. Neoh, *Prog. Polym. Sci.*, 2008, **33**, 917-978.
11. C.-L. Liu and W.-C. Chen, *Polym. Chem.*, 2011, **2**, 2169-2174.
12. H.-C. Tien, Y.-W. Huang, Y.-C. Chiu, Y.-H. Cheng, C.-C. Chueh and W.-Y. Lee, *J. Mater. Chem. C*, 2021, **9**, 2660-2684.
13. B. Lei, W. L. Kwan, Y. Shao and Y. Yang, *Org. Electron.*, 2009, **10**, 1048-1053.
14. Y. Yang, J. Ouyang, L. Ma, R. J. H. Tseng and C. W. Chu, *Adv. Funct. Mater.*, 2006, **16**, 1001-1014.
15. H.-J. Yen, C.-J. Chen and G.-S. Liou, *Adv. Funct. Mater.*, 2013, **23**, 5307-5316.
16. K. J. Baeg, Y. Y. Noh, J. Ghim, S. J. Kang, H. Lee and D. Y. Kim, *Adv. Mater.*, 2006, **18**, 3179-3183.
17. K.-J. Baeg, Y.-Y. Noh, J. Ghim, B. Lim and D.-Y. Kim, *Adv. Funct. Mater.*, 2008, **18**, 3678-3685.
18. W.-Y. Lee, H.-C. Wu, C. Lu, B. D. Naab, W.-C. Chen and Z. Bao, *Adv. Mater.*, 2017, **29**, 1605166.
19. T. Sekitani, T. Yokota, U. Zschieschang, H. Klauk, S. Bauer, K. Takeuchi, M. Takamiya, T. Sakurai and T. Someya, *Science*, 2009, **326**, 1516-1519.
20. P. Heremans, G. H. Gelinck, R. Müller, K.-J. Baeg, D.-Y. Kim and Y.-Y. Noh, *Chem. Mater.*, 2010, **23**, 341-358.
21. R. C. G. Naber, C. Tanase, P. W. M. Blom, G. H. Gelinck, A. W. Marsman, F. J. Touwslager, S. Setayesh and D. M. de Leeuw, *Nat Mater*, 2005, **4**, 243-248.
22. J.-C. Hsu, W.-Y. Lee, H.-C. Wu, K. Sugiyama, A. Hirao and W.-C. Chen, *J. Mater. Chem.*, 2012, **22**, 5820-5827.
23. Z.-Y. Wei, S. P. Prakoso, Y.-T. Li and Y.-C. Chiu, *Adv. Electron. Mater.*, 2022, **8**, 2101349.
24. C.-T. Lo, H.-C. Wu, W.-Y. Lee and W.-C. Chen, *React. Funct. Polym.*, 2016, **108**, 31-38.
25. J. Aimi, C.-T. Lo, H.-C. Wu, C.-F. Huang, T. Nakanishi, M. Takeuchi and W.-C. Chen, *Adv. Electron. Mater.*, 2016, **2**, 1500300.
26. K.-J. Baeg, Y.-Y. Noh, H. Sirringhaus and D.-Y. Kim, *Adv. Funct. Mater.*, 2010, **20**, 224-230.
27. C.-C. Shih, Y.-C. Chiu, W.-Y. Lee, J.-Y. Chen and W.-C. Chen, *Adv. Funct. Mater.*, 2015, **25**, 1511-1519.
28. W. Kim, A. Javey, O. Vermesh, Q. Wang, Y. Li and H. Dai, *Nano Lett.*, 2003, **3**, 193-198.
29. C.-T. Lo, Y. Watanabe, D. Murakami, C.-C. Shih, K. Nakabayashi, H. Mori and W.-C. Chen, *Macromol. Rapid Commun.*, 2019, **40**, 1900115.

30. N. Takagi and T. Higashihara, *Macromol. Chem. Phys.*, 2019, **220**, 1970029.
31. J. C. Bijleveld, A. P. Zoombelt, S. G. J. Mathijssen, M. M. Wienk, M. Turbiez, D. M. de Leeuw and R. A. J. Janssen, *J. Am. Chem. Soc.*, 2009, **131**, 16616-16617.
